# Supplementary material for: Ich Weiss Nicht Was Soll Es Bedeuten: Language Matters in Medicine
Source: PLOS journal article supplement (doi:10.1371/journal.pmed.0030122), 2006-02-22
Supplement: S1 (10.1371/journal.pmed.0030122.s001) [file journal.pmed.0030122.s001]

**Text S1.**  List of Free Online Translation Software

(Some of these sites sell translation services in addition to the free tools provided.)

http://babelfish.altavista.com

http://www.google.com/language_tools?hl=en

http://www.freetranslation.com

http://www.online-translator.com/translator.asp?lang=en

http://www.lexicool.com/translate.asp

http://www.translationtown.com/tt/datos/onlinetranslation.asp
